# Supplementary material for: PAMAM-Functionalized Cellulose Nanocrystals with Needle-Like Morphology for Effective Cancer Treatment
Source: MDPI journal article supplement (doi:10.3390/nano11071640), 2021-06-22
Supplement: s1 [file s1]

## Supplementary Materials

# PAMAM-Functionalized Cellulose Nanocrystals with Needle-like Morphology for Effective Cancer Treatment

Yanzhen Sun<sup>1</sup>, Xiaoli Ma<sup>2</sup>, Xiaodong Jing<sup>1</sup> and Hao Hu<sup>1,\*</sup>

<sup>1</sup> Institute of Biomedical Materials and Engineering, College of Materials Science and Engineering, Qingdao University, Qingdao 266071, China; sunyanzhen1920@163.com (Y.S.); Jingxiaodong5230@163.com (X.J.)

<sup>2</sup> Qingdao Institute of Measurement Technology, Qingdao 266000, China; maxiaoli1989@yeah.net

\* Correspondence: huhao@qdu.edu.cn

EDA was added into 25 mL of methanol, and then MA was added dropwise into the solution under a nitrogen atmosphere. The reaction mixture was stirred at 4 °C for 30 min and an additional 24 h at room temperature. Methanol and excess MA were evaporated off using a rotary evaporator. Then the half generation (G0.5) PAMAM dendrimer was obtained. To prepare PAMAM G1, a certain amount of EDA was added dropwise to 25 mL of PAMAM G0.5 dendrimer solution in methanol under a nitrogen atmosphere, and the reaction mixture was stirred at 4 °C for 30 min and then at room temperature for 24 h. PAMAM G1 was obtained after removing methanol and the excess EDA by using the rotary evaporator at 55 °C. The steps for synthesizing high generation dendrimers are similar and the molar ratio of the reactants was summarized in Table S1.

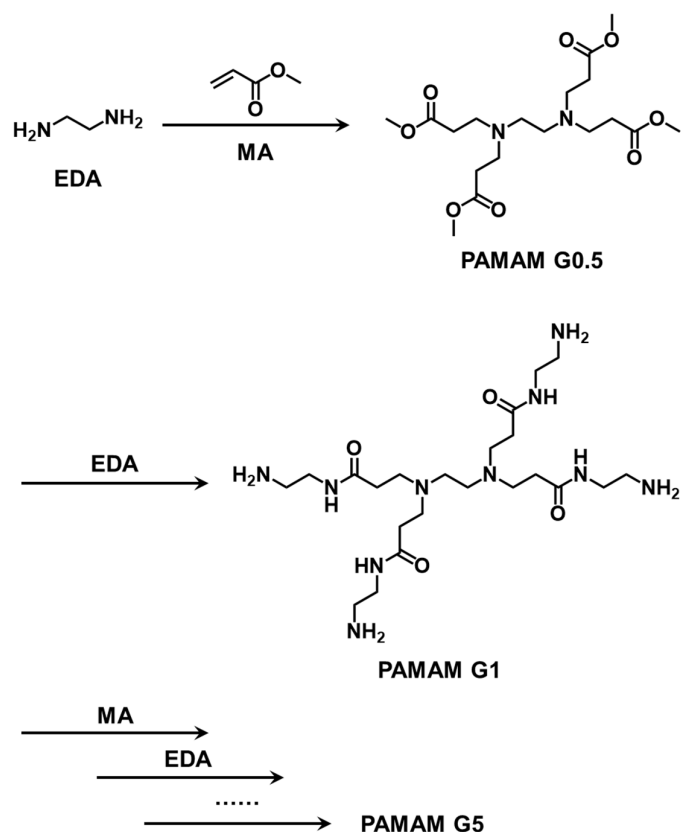

**Figure S1.** Reaction scheme of the PAMAM dendrimer.

**Table S1** The molar ratio of the reactants for PAMAM preparation.

| Sample     | Molar ratio      |          |
|------------|------------------|----------|
| PAMAM G0.5 | EDC : MA         | = 1 : 4  |
| PAMAM G1.0 | PAMAM G0.5 : EDA | = 1 : 4  |
| PAMAM G1.5 | PAMAM G1.0 : MA  | = 1 : 8  |
| PAMAM G2.0 | PAMAM G1.5 : EDA | = 1 : 8  |
| PAMAM G2.5 | PAMAM G2.0 : MA  | = 1 : 16 |
| PAMAM G3.0 | PAMAM G2.5 : EDA | = 1 : 16 |
| PAMAM G3.5 | PAMAM G3.0 : MA  | = 1 : 32 |
| PAMAM G4.0 | PAMAM G3.5 : EDA | = 1 : 32 |
| PAMAM G4.5 | PAMAM G4.0 : MA  | = 1 : 64 |
| PAMAM G5.0 | PAMAM G4.5 : EDA | = 1 : 64 |

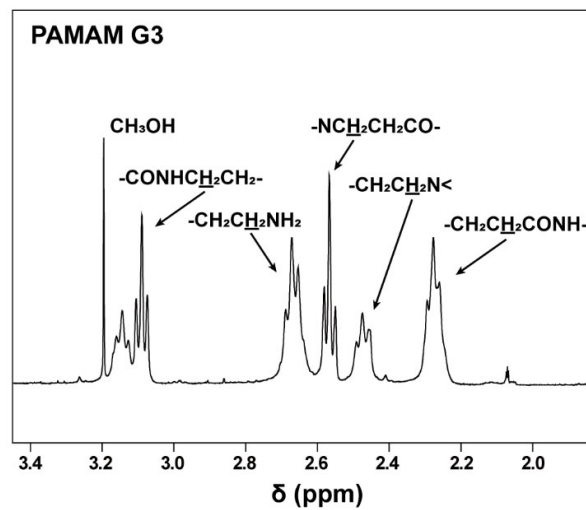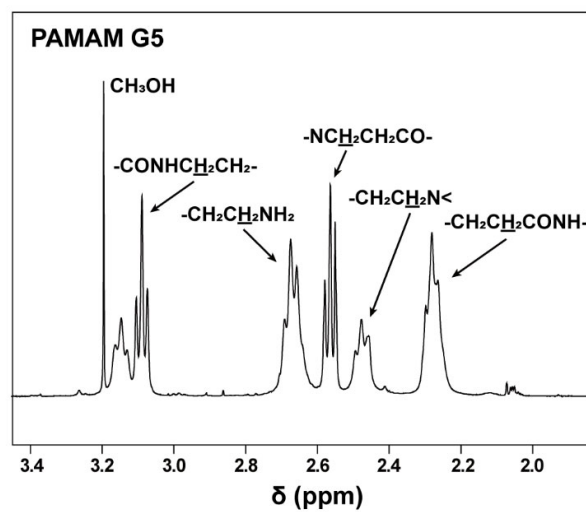

**Figure S2.** <sup>1</sup>H NMR spectra of PAMAM G3 and PAMAM G5.

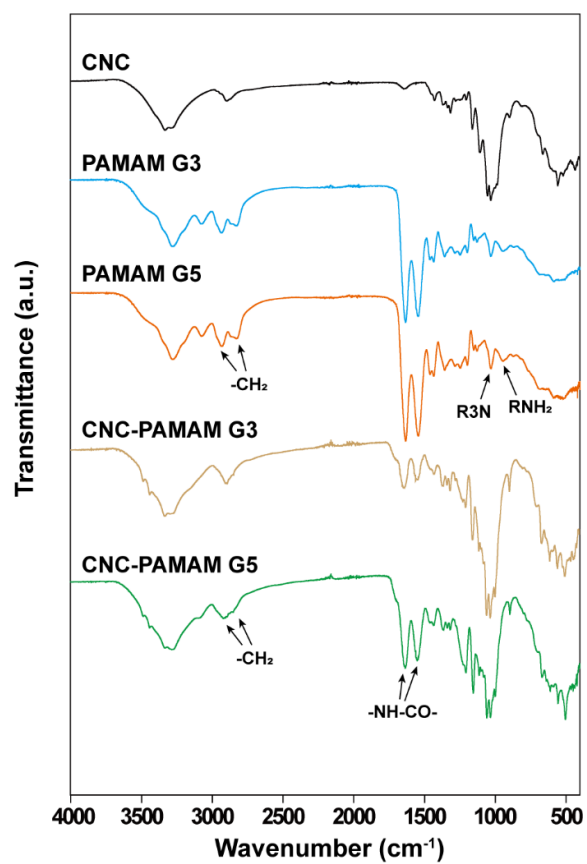

**Figure S3.** FTIR spectra of CNC, PAMAM G3, PAMAM G5, CNC-PAMAM G3 and CNC-PAMAM G5.
